# Supplementary material for: A LSER-based model to predict the solubilizing effect of drugs by inclusion with cucurbit[7]uril
Source: Royal Society of Chemistry journal article supplement (doi:10.1039/d0ra03394d), 2020-01-01
Supplement: d0ra03394d1.pdf [file d0ra03394d1.pdf]

## Supplementary Information For

### A LSER-based model to predict the solubilizing effect of drugs by inclusion with cucurbit[7]uril

Enping Cheng,<sup>a</sup> Yangyan Zeng,<sup>a</sup> Yan Huang,<sup>a</sup> Tiezhu Su,<sup>a</sup> Yang Yang,<sup>a</sup> Li Peng,<sup>\*a</sup> and Jun Li <sup>\*a,b,c</sup>

<sup>a</sup> College of Chemistry and Chemical Engineering, Xiamen University, Xiamen 361005, China. Email: li.peng@xmu.edu.cn; junnyxm@xmu.edu.cn, Tel: +86-592-2183055

<sup>b</sup> Collaborative Innovation Center of Chemistry for Energy Materials, Xiamen University, Xiamen 361005, China.

<sup>c</sup> National Engineering Laboratory for Green Chemical Productions of Alcohols, Ethers and Esters, Xiamen University, Xiamen 361005, China.

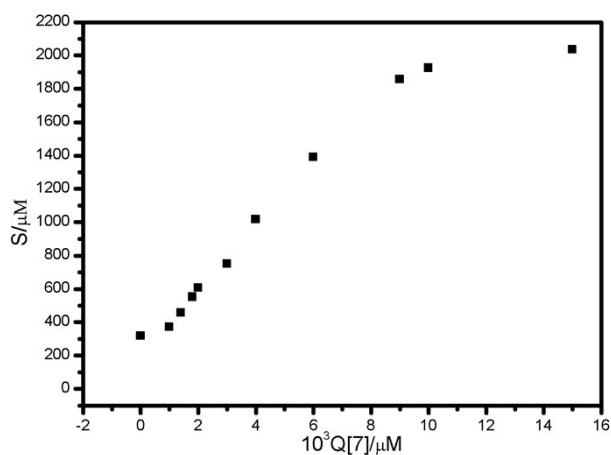

Fig. S1 Phase-solubility diagram of mixtures of VB<sub>2</sub> and cucurbit[7]uril in aqueous solvent (pH = 7).

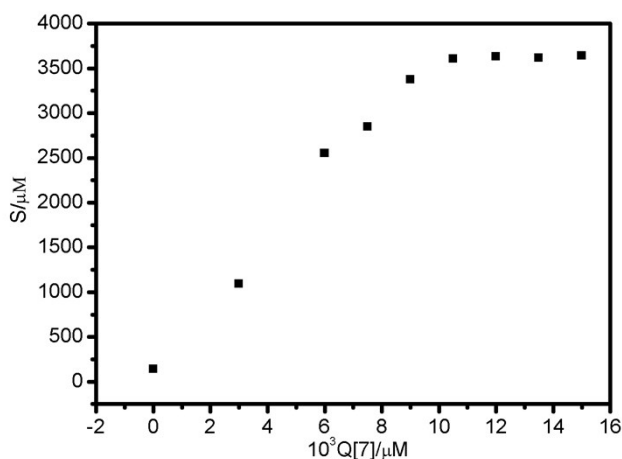

Fig. S2 Phase-solubility diagram of mixtures of triamterene and cucurbit[7]uril in aqueous solvent (pH = 7).

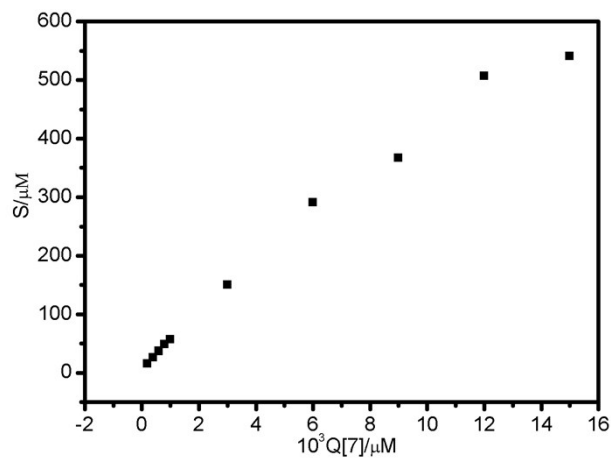

**Fig. S3** Phase-solubility diagram of mixtures of guanine and cucurbit[7]uril in aqueous solvent (pH = 7).

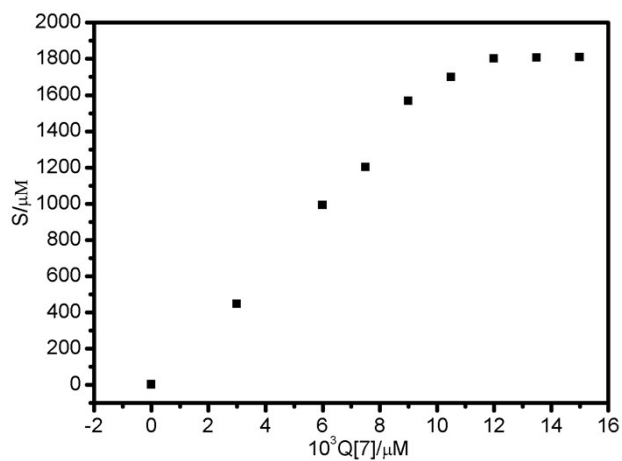

**Fig. S4** Phase-solubility diagram of mixtures of 2-hydroxychalcone and cucurbit[7]uril in aqueous solvent (pH = 7).

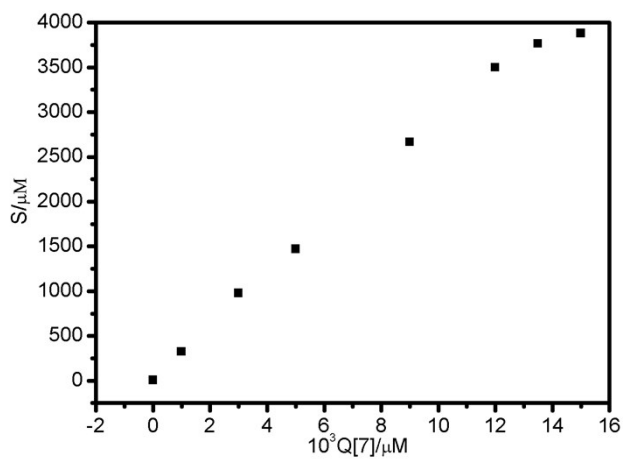

**Fig. S5** Phase-solubility diagram of mixtures of gefitinib and cucurbit[7]uril in aqueous solvent (pH = 7).

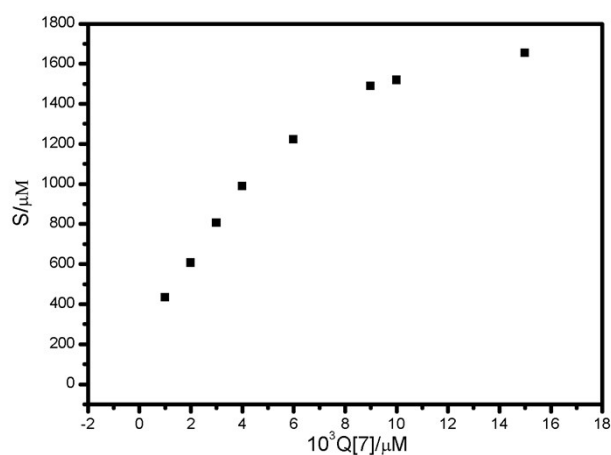

Fig. S6 Phase-solubility diagram of mixtures of VB<sub>9</sub> and cucurbit[7]uril in aqueous solvent (pH = 7).

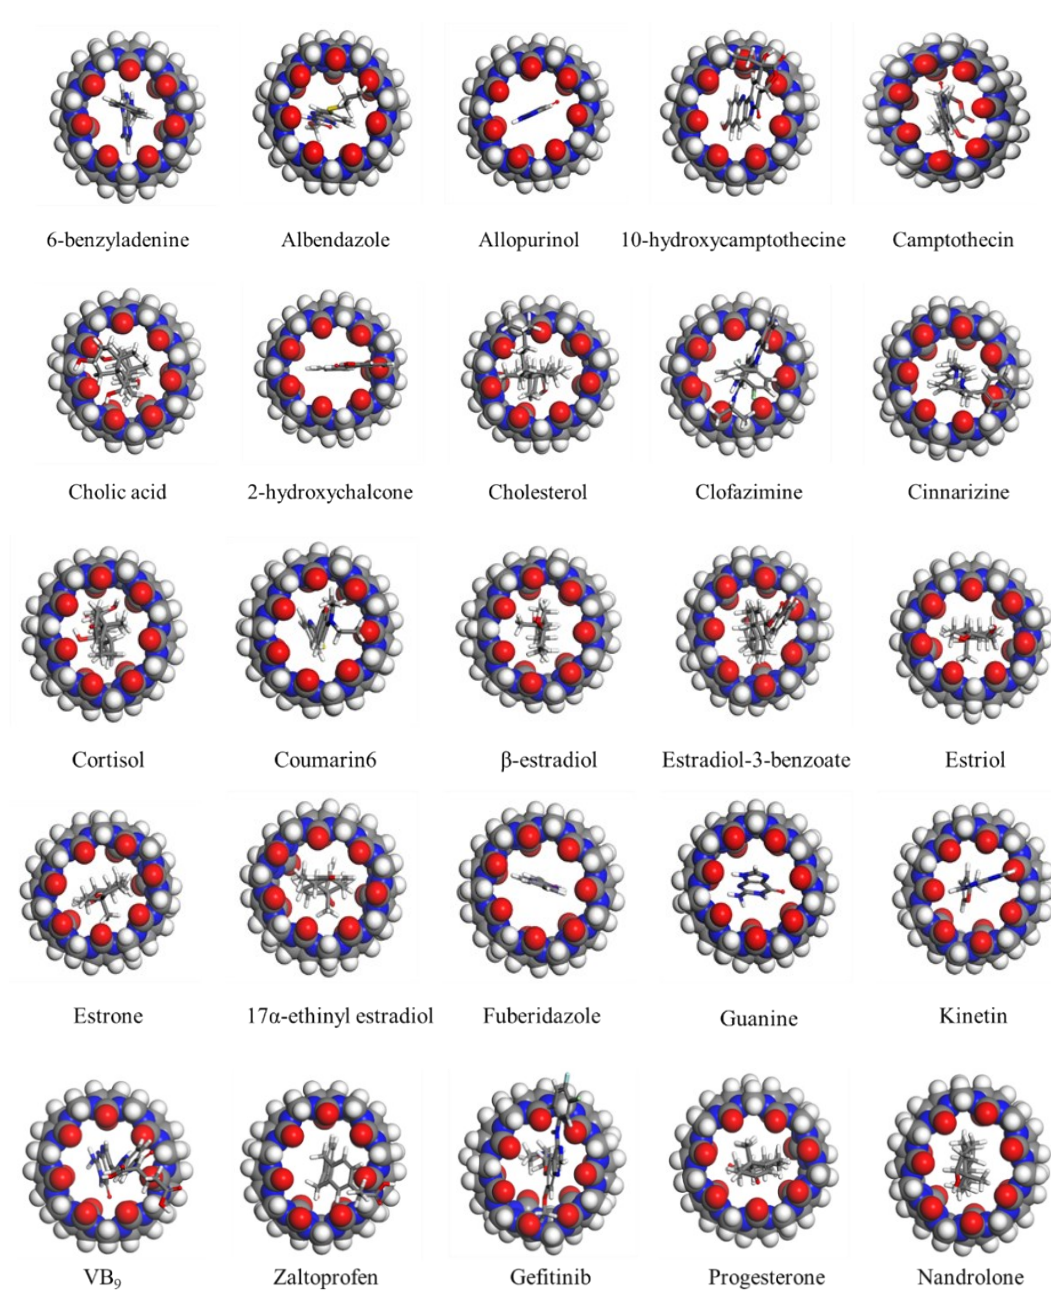

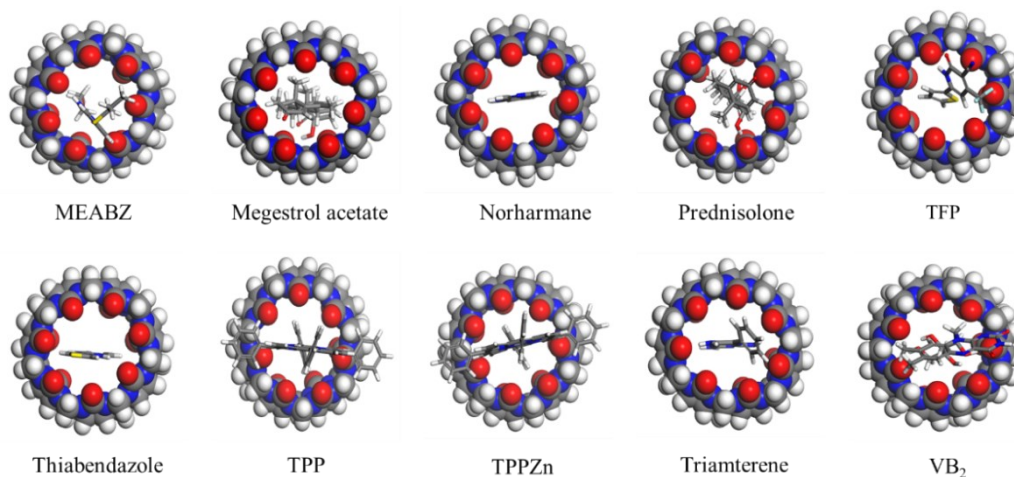

Fig. S7 Optimized inclusion structures at the DFT / B3LYP / 6-311G\* level.

Table S1. The molecular parameters of 35 drug-cucurbit[7]uril inclusions.

| #                       | $\chi_1/\text{a.u.}$ | $\log p_{1w}/\text{a.u.}$ | $I_3/\text{a.u.}$ | $E_{3LUMO}/\text{a.u.}$ | $A_3/\text{Bohr}^2$ |
|-------------------------|----------------------|---------------------------|-------------------|-------------------------|---------------------|
| Cinnarizine             | 2.544E-01            | 5.524E+00                 | 3.979E-02         | -4.170E-03              | 4.124E+03           |
| Allopurinol             | 2.961E-01            | -7.547E-01                | 4.203E-02         | -3.710E-03              | 3.176E+03           |
| MEABZ                   | 2.479E-01            | 3.302E+00                 | 4.063E-02         | -8.390E-03              | 3.839E+03           |
| Albendazole             | 2.481E-01            | 3.433E+00                 | 4.344E-02         | -2.340E-03              | 3.531E+03           |
| Thiabendazole           | 2.762E-01            | 4.078E+00                 | 4.361E-02         | -2.230E-03              | 3.341E+03           |
| 6-benzyladenine         | 2.476E-01            | 2.146E+00                 | 4.390E-02         | -3.280E-03              | 3.355E+03           |
| Gefitinib               | 2.636E-01            | 4.203E+00                 | 4.066E-02         | -1.415E-02              | 3.925E+03           |
| Kinetin                 | 2.624E-01            | 1.264E+00                 | 4.401E-02         | -1.194E-02              | 3.483E+03           |
| Nandrolone              | 2.875E-01            | 3.267E+00                 | 4.414E-02         | -8.430E-03              | 3.162E+03           |
| Norharmane              | 2.701E-01            | 2.173E+00                 | 4.398E-02         | -5.570E-03              | 3.344E+03           |
| Triamterene             | 2.674E-01            | 1.279E+00                 | 4.228E-02         | -6.600E-03              | 3.302E+03           |
| 2-hydroxychalcone       | 3.270E-01            | 3.460E+00                 | 4.131E-02         | -4.671E-02              | 3.606E+03           |
| VB <sub>9</sub>         | 2.933E-01            | -2.311E-01                | 3.818E-02         | -3.927E-02              | 3.967E+03           |
| Fuberidazole            | 2.608E-01            | 4.125E+00                 | 4.394E-02         | -5.410E-03              | 3.423E+03           |
| 10-hydroxycamptothecine | 3.100E-01            | 1.504E+00                 | 3.939E-02         | -4.160E-02              | 3.649E+03           |
| Prednisolone            | 2.958E-01            | 1.260E+00                 | 4.077E-02         | -1.247E-02              | 3.326E+03           |
| Clofazimine             | 2.844E-01            | 7.137E+00                 | 3.682E-02         | -5.383E-02              | 4.312E+03           |
| $\beta$ -estradiol      | 2.850E-01            | 3.838E+00                 | 4.177E-02         | -5.860E-03              | 3.470E+03           |
| VB <sub>2</sub>         | 3.549E-01            | -6.020E-02                | 3.982E-02         | -7.024E-02              | 3.661E+03           |
| TFP                     | 3.642E-01            | 1.892E+00                 | 4.165E-02         | -5.538E-02              | 3.435E+03           |
| Progesterone            | 2.908E-01            | 3.860E+00                 | 4.054E-02         | -1.015E-02              | 3.308E+03           |
| Cholic acid             | 2.525E-01            | 2.913E+00                 | 3.815E-02         | -6.500E-03              | 3.840E+03           |
| Cortisol                | 3.091E-01            | 1.284E+00                 | 4.199E-02         | -1.031E-02              | 3.125E+03           |
| TPP                     | 2.792E-01            | 8.690E+00                 | 3.483E-02         | -6.332E-02              | 4.862E+03           |
| Guanine                 | 2.334E-01            | -1.288E+00                | 4.245E-02         | -7.080E-03              | 3.061E+03           |
| Estriol                 | 2.322E-01            | 2.871E+00                 | 4.189E-02         | -6.220E-03              | 3.501E+03           |
| Estrone                 | 2.449E-01            | 3.939E+00                 | 4.193E-02         | -6.660E-03              | 3.455E+03           |
| TPPZn                   | 2.751E-01            | 9.531E+00                 | 3.433E-02         | -6.020E-02              | 4.860E+03           |

| Camptothecin           | 3.208E-01           | 1.746E+00                   | 3.884E-02                   | -4.140E-02             | 3.339E+03              |
|------------------------|---------------------|-----------------------------|-----------------------------|------------------------|------------------------|
| Coumarin6              | 2.817E-01           | 5.382E+00                   | 3.933E-02                   | -3.409E-02             | 3.731E+03              |
| Megestrol acetate      | 3.049E-01           | 3.127E+00                   | 3.889E-02                   | -2.401E-02             | 3.306E+03              |
| Zaltoprofen            | 2.991E-01           | 3.541E+00                   | 3.891E-02                   | -2.315E-02             | 3.408E+03              |
| Cholesterol            | 2.269E-01           | 7.376E+00                   | 3.694E-02                   | -5.920E-03             | 3.637E+03              |
| Estradiol-3-benzoate   | 2.314E-01           | 5.512E+00                   | 3.923E-02                   | -3.514E-02             | 3.617E+03              |
| 17 -ethinyl estradiol  | 2.339E-01           | 4.887E+00                   | 4.254E-02                   | -6.340E-03             | 3.093E+03              |
| #                      | $V_1/\text{Bohr}^3$ | $\Delta E_{12}/\text{a.u.}$ | $\Delta G_{3w}/\text{a.u.}$ | $E_{1max}/\text{a.u.}$ | $E_{1min}/\text{a.u.}$ |
| Cinnarizine            | 3.430E+03           | -1.799E-02                  | -2.321E-01                  | 2.368E-02              | -4.457E-02             |
| Allopurinol            | 9.968E+02           | -3.385E-02                  | -2.243E-01                  | 8.059E-02              | -6.020E-02             |
| MEABZ                  | 2.592E+03           | -2.912E-02                  | -2.283E-01                  | 7.078E-02              | -5.482E-02             |
| Albendazole            | 2.195E+03           | -3.085E-02                  | -2.270E-01                  | 6.956E-02              | -5.520E-02             |
| Thiabendazole          | 1.575E+03           | -2.335E-02                  | -2.227E-01                  | 6.603E-02              | -5.750E-02             |
| 6-benzyladenine        | 1.861E+03           | -3.171E-02                  | -2.297E-01                  | 7.971E-02              | -5.423E-02             |
| Gefitinib              | 3.525E+03           | -3.670E-02                  | -1.051E-02                  | 8.872E-02              | -5.602E-02             |
| Kinetin                | 1.689E+03           | -3.409E-02                  | -2.384E-01                  | 9.553E-02              | -8.059E-02             |
| Nandrolone             | 2.491E+03           | -3.179E-02                  | -2.314E-01                  | 7.203E-02              | -6.759E-02             |
| Norharmane             | 1.426E+03           | -2.214E-02                  | -2.253E-01                  | 8.059E-02              | -6.382E-02             |
| Triamterene            | 2.000E+03           | -3.689E-02                  | -2.365E-01                  | 5.864E-02              | -7.902E-02             |
| 2-hydroxychalcone      | 1.936E+03           | -2.037E-02                  | -2.204E-01                  | 4.664E-02              | -5.037E-02             |
| VB <sub>9</sub>        | 3.334E+03           | -6.687E-02                  | -2.558E-01                  | 1.032E-01              | -6.912E-02             |
| Fuberidazole           | 1.512E+03           | -1.876E-02                  | -2.258E-01                  | 7.431E-02              | -6.150E-02             |
| 10-hydroxycamptothecin | 2.759E+03           | -3.549E-02                  | -2.356E-01                  | 9.962E-02              | -6.150E-02             |
| Prednisolone           | 2.992E+03           | -5.718E-02                  | -2.245E-01                  | 9.706E-02              | -7.051E-02             |
| Clofazimine            | 3.825E+03           | -1.571E-02                  | -2.342E-01                  | 4.122E-02              | -4.963E-02             |
| $\beta$ -estradiol     | 2.439E+03           | -2.875E-02                  | -2.286E-01                  | 8.129E-02              | -5.716E-02             |
| VB <sub>2</sub>        | 2.851E+03           | -3.901E-02                  | -2.497E-01                  | 9.301E-02              | -6.987E-02             |
| TFP                    | 1.807E+03           | -4.083E-02                  | -2.136E-01                  | 9.022E-02              | -6.847E-02             |
| Progesterone           | 2.881E+03           | -4.303E-02                  | -2.201E-01                  | 3.087E-02              | -6.595E-02             |
| Cholic acid            | 3.615E+03           | -3.896E-02                  | -2.418E-01                  | 7.697E-02              | -6.243E-02             |
| Cortisol               | 3.032E+03           | -6.272E-02                  | -2.232E-01                  | 7.905E-02              | -6.470E-02             |
| TPP                    | 5.166E+03           | -1.208E-02                  | -2.338E-01                  | 2.402E-02              | -4.491E-02             |
| Guanine                | 1.102E+03           | -4.942E-02                  | -2.314E-01                  | 8.716E-02              | -8.245E-02             |
| Estriol                | 2.504E+03           | -2.935E-02                  | -2.355E-01                  | 8.162E-02              | -5.791E-02             |
| Estrone                | 2.390E+03           | -3.157E-02                  | -2.244E-01                  | 8.302E-02              | -5.955E-02             |
| TPPZn                  | 5.185E+03           | -1.152E-02                  | -2.536E-01                  | 6.329E-02              | -2.798E-02             |
| Camptothecin           | 2.696E+03           | -4.175E-02                  | -2.304E-01                  | 4.634E-02              | -5.997E-02             |
| Coumarin6              | 2.867E+03           | -2.959E-02                  | -2.309E-01                  | 4.230E-02              | -8.913E-02             |
| Megestrol acetate      | 3.025E+03           | -3.641E-02                  | -2.181E-01                  | 4.037E-02              | -6.820E-02             |
| Zaltoprofen            | 2.354E+03           | -3.785E-02                  | -2.211E-01                  | 7.840E-02              | -5.844E-02             |
| Cholesterol            | 3.851E+03           | -3.898E-02                  | -2.114E-01                  | 6.732E-02              | -6.062E-02             |
| Estradiol-3-benzoate   | 3.272E+03           | -3.326E-02                  | -2.263E-01                  | 6.931E-02              | -6.126E-02             |
| 17 -ethinyl estradiol  | 2.637E+03           | -4.312E-02                  | -2.218E-01                  | 8.107E-02              | -5.232E-02             |

**Table S2.** Standardized residuals and leverage of the model.

| #                      | Standardized residual | Leverage |
|------------------------|-----------------------|----------|
| Cinnarizine            | 0.583                 | 0.252    |
| Allopurinol            | 1.314                 | 0.154    |
| MEABZ                  | 1.189                 | 0.088    |
| Albendazole            | 1.037                 | 0.085    |
| Thiabendazole          | 0.683                 | 0.122    |
| 6-benzyladenine        | 1.055                 | 0.101    |
| Gefitinib              | -0.430                | 0.077    |
| Kinetin                | -0.532                | 0.157    |
| Nandrolone             | 1.087                 | 0.118    |
| Norharmane             | -0.110                | 0.069    |
| Triamterene            | 1.703                 | 0.079    |
| 2-hydroxychalcone      | 0.577                 | 0.175    |
| VB <sub>9</sub>        | -0.880                | 0.371    |
| Fuberidazole           | -0.932                | 0.105    |
| 10-hydroxycamptothecin | 0.525                 | 0.111    |
| Prednisolone           | -0.414                | 0.067    |
| Clofazimine            | 1.509                 | 0.135    |
| β -estradiol           | -1.479                | 0.091    |
| VB <sub>2</sub>        | 0.158                 | 0.519    |
| TFP                    | -1.056                | 0.391    |
| Progesterone           | 0.206                 | 0.100    |
| Cholic acid            | -1.193                | 0.211    |
| Cortisol               | -1.342                | 0.094    |
| TPP                    | -0.601                | 0.300    |
| Guanine                | 1.248                 | 0.424    |
| Estriol                | -0.639                | 0.114    |
| Estrone                | -0.503                | 0.043    |
| TPPZn                  | -0.398                | 0.311    |
| Camptothecin           | 1.148                 | 0.176    |
| Coumarin6              | 0.197                 | 0.043    |
| Megestrol acetate      | 0.820                 | 0.134    |
| Zaltoprofen            | -0.211                | 0.096    |
| Cholesterol            | 0.092                 | 0.360    |
| Estradiol-3-benzoate   | 0.298                 | 0.366    |
| 17 -ethinyl estradiol  | -1.449                | 0.236    |

**Table S3.** The molecular parameters of MEABZ by inclusion with cucurbit[n]uril (n=6,7,8).

|                    | MEABZ-cucurbit[6]uril | MEABZ-cucurbit[7]uril | MEABZ-cucurbit[8]uril |
|--------------------|-----------------------|-----------------------|-----------------------|
| $\chi_1/a.u.$      | 2.479E-01             | 2.479E-01             | 2.479E-01             |
| $\log p_{1w}/a.u.$ | 3.302E+00             | 3.302E+00             | 3.302E+00             |
| $I_3/a.u.$         | 3.808E-02             | 4.063E-02             | 4.020E-02             |

|                         |            |            |            |
|-------------------------|------------|------------|------------|
| $E_{3LUMO}/\text{a.u.}$ | -6.970E-03 | -8.390E-03 | -1.114E-02 |
| $A_3/\text{Bohr}^2$     | 3.141E+03  | 3.839E+03  | 4.396E+03  |

---
